# Supplementary material
Source: PubMed Central journal article supplement (PMC10992226)

**B7-H3 confers resistance to V $\gamma$ 9V $\delta$ 2 T cell-mediated cytotoxicity in human colon cancer cells via the STAT3/ULBP2 axis**

**Supplementary Table 1. Primers for RT-qPCR assay of genes in this study**

| Primer Name         | Primer Sequence (5'-3') |
|---------------------|-------------------------|
| Human-B7H3 Forward  | ACAGGGCAGCCTATGACATT    |
| Human-B7H3 Reverse  | CTGCATTCTCCTCCTCACAG    |
| Human-ULBP1 Forward | TAAGTCCAGACCTGAACCACA   |
| Human-ULBP1 Reverse | TCCACCACGTCTCTTAGTGTT   |
| Human-ULBP2 Forward | AGCAACTGCGTGACATTCAG    |
| Human-ULBP2 Reverse | GCCATCCTATACAGTCTCCCA   |
| Human-ULBP3 Forward | TCTATGGGTCACCTAGAAGAGC  |
| Human-ULBP3 Reverse | TCCACTGGGTGTGAAATCCTC   |
| Human-ULBP4 Forward | GCACTTGGGGAGAATTGACCC   |
| Human-ULBP4 Reverse | ACATCTCGACTTGCAGAGTGG   |
| Human-ULBP5 Forward | GACAGCTACCAAATAGCGAAGC  |
| Human-ULBP5 Reverse | GGTAAGGAGTGTGAGTCGTCT   |
| Human-MICA Forward  | AGGGTTTCTTGCTGAGGTACA   |
| Human-MICA Reverse  | GGTCTCTCTGTCCCATGTCTTA  |
| Human-MICB Forward  | TCTTCGTTACAACCTCATGGTG  |
| Human-MICB Reverse  | TCCCAGGTCTTAGCTCCCAG    |
| Human-MHCI Reverse  | GATTACATCGCCTTGAACGAGG  |

|                               |                       |
|-------------------------------|-----------------------|
| Human-MHCI Reverse            | AGAGACAGCGTGGTGAGTCAT |
| Human-BTN3A1 Reverse          | AAAGCACAAGAGTGAAGCTCC |
| Human-BTN3A1 Reverse          | GCCGAGAACACAATAATGCCA |
| Human-CD155 Reverse           | TGGAGGTGACGCATGTGTC   |
| Human-CD155 Reverse           | GTTTGGACTCCGAATAGCTGG |
| Human- $\beta$ -actin Forward | CATGTACGTTGCTATCCAGGC |
| Human- $\beta$ -actin Reverse | CTCCTTAATGTCACGCACGAT |

---

**Supplementary Table 2. Clinical characteristics of colon cancer (CC) patients**

| CC patients           | Number |
|-----------------------|--------|
| No. of patients       | 106    |
| Gender                |        |
| Male                  | 61     |
| Female                | 45     |
| Age (years)           |        |
| Mean                  | 61.72  |
| Range                 | 26-81  |
| Tumor location        |        |
| Right hemicolon       | 52     |
| Left hemicolon        | 54     |
| Tumor volume          |        |
| $>6.5\text{cm}^3$     | 83     |
| $\leq 6.5\text{cm}^3$ | 23     |
| Distant metastasis    |        |
| Yes                   | 3      |
| No                    | 103    |
| TNM stage             |        |
| I-II                  | 54     |
| III-IV                | 52     |

## Supplementary Fig. 1. B7-H3-overexpressing CC cells resist the killing effect of V $\delta$ 2 T cells

(a) The mRNA expression of B7-H3 in B7-H3-overexpressing HCT116 and RKO cells was analyzed by RT-qPCR. (b) The cytotoxicity of V $\delta$ 2 T cells (effector cells, E) against HCT116 or RKO cells (target cells, T) at different E/T ratios was analyzed by CCK-8 assay. (c, d) Representative images of the clusters in which V $\delta$ 2 T cells formed surrounding B7-H3-overexpressing HCT116 (c) or RKO (d) cells. Values are expressed as the means  $\pm$  SD. Data are representative of results from 3 independent experiments. \* $p$ <0.05, \*\* $p$ <0.01, and \*\*\* $p$ <0.001.

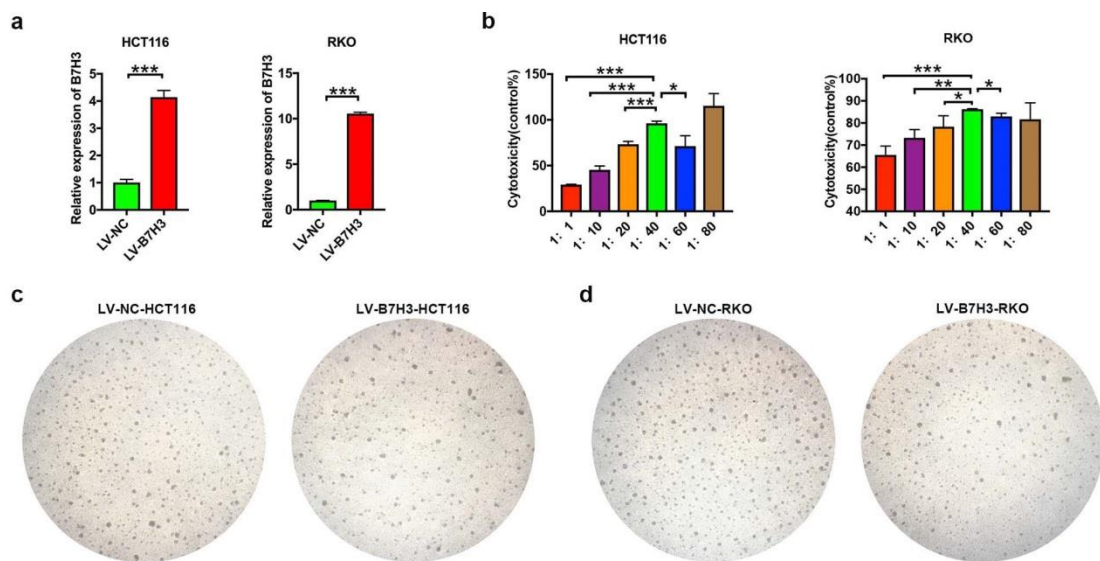

**Supplementary Fig. 2. B7-H3 knockdown CC cells are sensitive to the killing effect of V $\delta$ 2 T cells**

(a) The mRNA expression of B7-H3 in B7-H3-knockdown HCT116 and RKO cells was analyzed by RT-qPCR. (b, c) Representative images of the clusters of V $\delta$ 2 T cells that formed around B7-H3 knockdown HCT116 (b) or RKO (c) cells. Values are expressed as the means  $\pm$  SD. Data are representative of results from 3 independent experiments. \*\*\* $p$ <0.001.

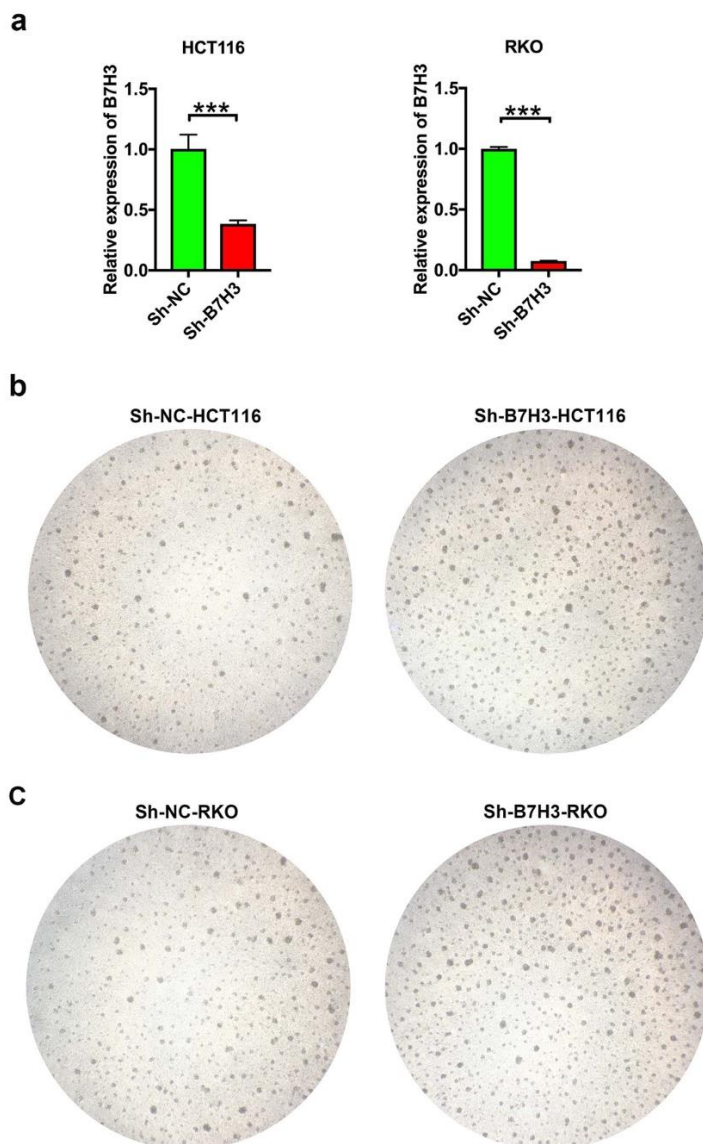

**Supplementary Fig. 3. The expression of  $\gamma\delta$ T cells in B7-H3-overexpressing HCT116 tumors treated with  $\gamma\delta$ T cells.**

Immunofluorescence represents infiltrating  $\gamma\delta$ T cell expression in B7-H3-overexpressing HCT116 cell tumors in SCID mice following V $\delta$ 2 T cell injection.

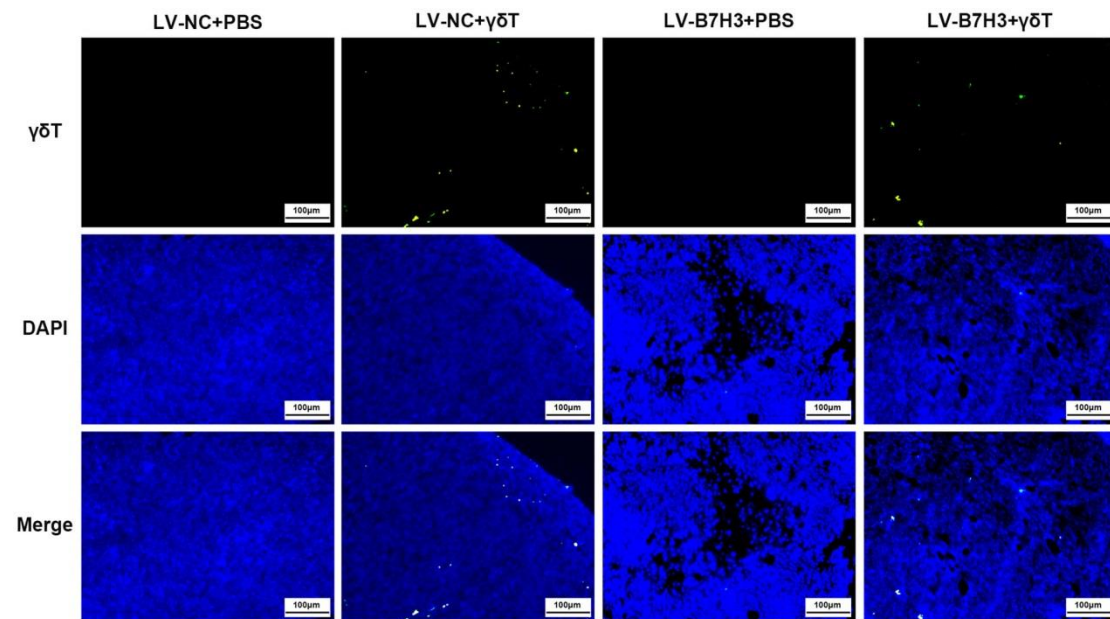

**Supplementary Fig. 4. B7-H3 knockdown CC cells promote the formation of V $\delta$ 2 T cell clusters by suppressing ULBP2**

(a, b) Representative images showing the clusters of V $\delta$ 2 T cells around B7-H3-knockdown HCT116 (a) and RKO (b) cells treated with ULBP2-siRNA or ULBP2 monoclonal blocking antibody (ULBP2 mAb).

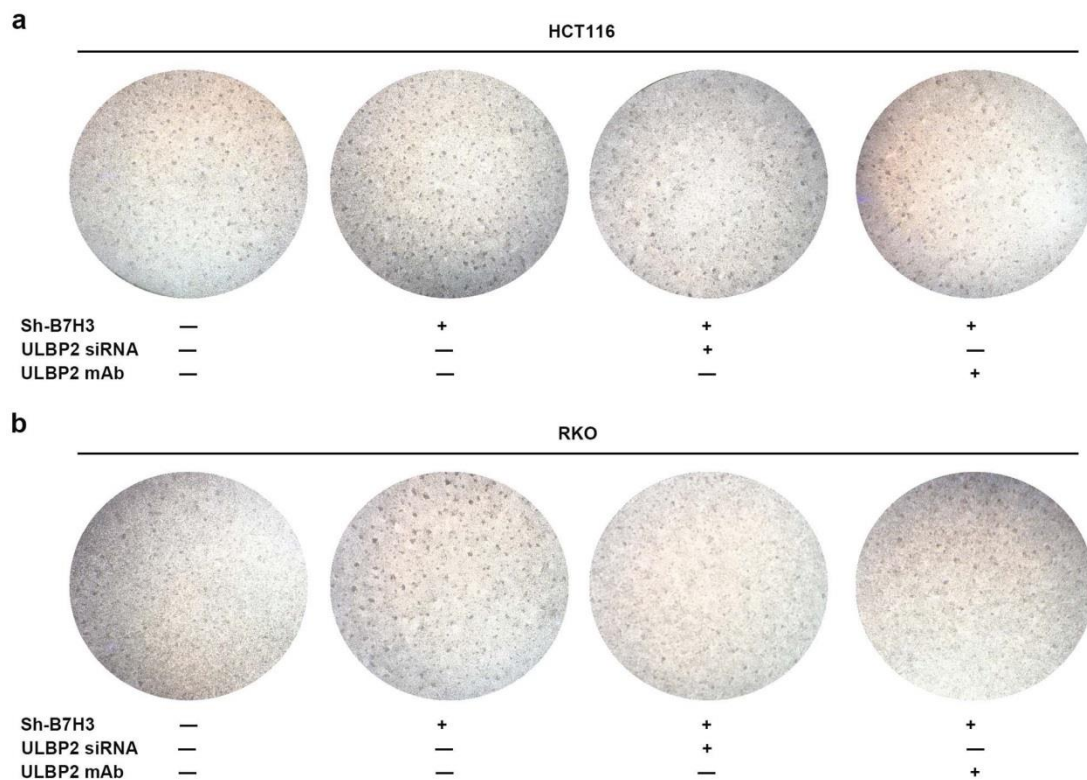

**Supplementary Fig. 5. B7-H3-overexpressing CC cells inhibit the formation of V $\delta$ 2 T cell clusters via STAT3.**

(a, b) Representative images showing the clusters of V $\delta$ 2 T cells around B7-H3-overexpressing HCT116 (a) and RKO (b) cells treated with or without cryptotanshinone (CTN).

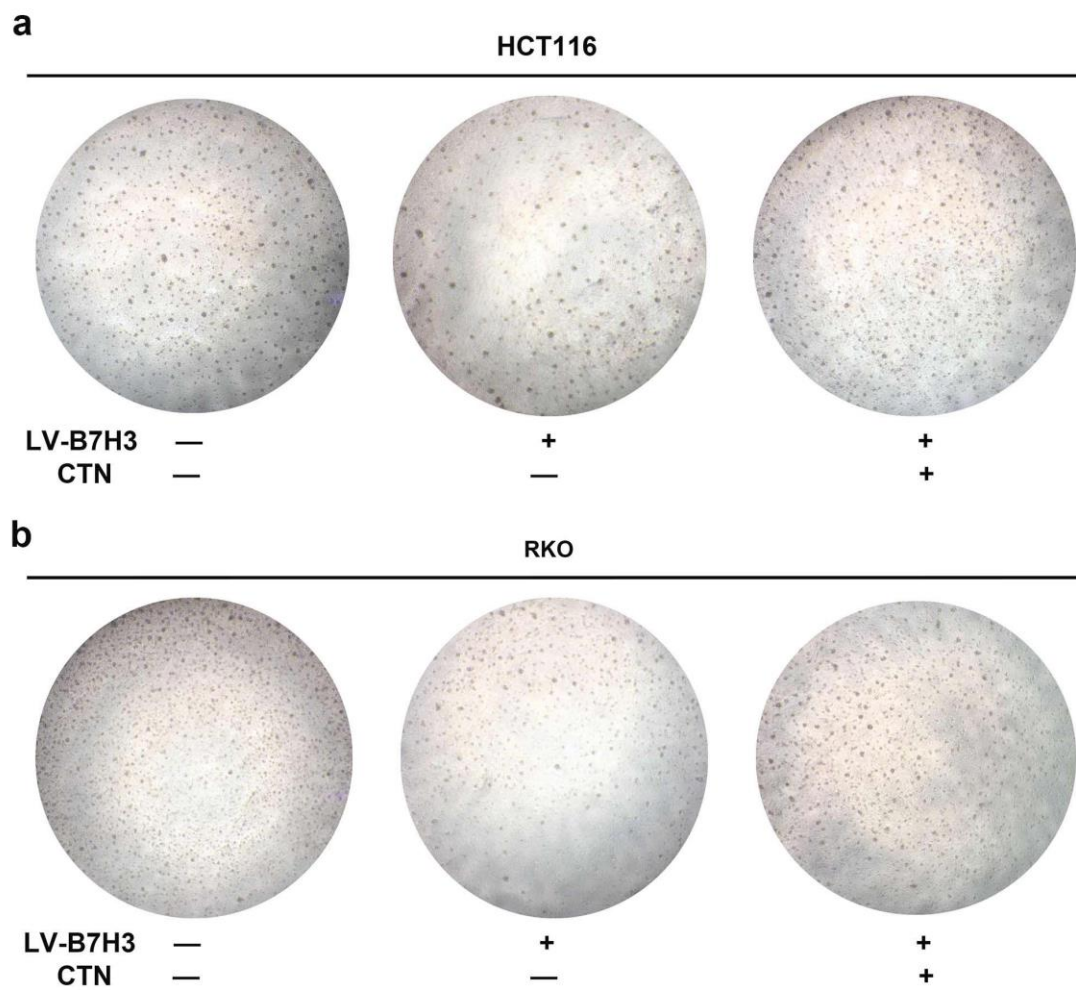



**Supplementary Fig. 6. The expression of  $\gamma\delta$ T cells in NAT samples was higher than CC samples in colon cancer patient specimens.**

Immunofluorescence represents infiltrating  $\gamma\delta$ T cell expression in NAT samples and CC samples.

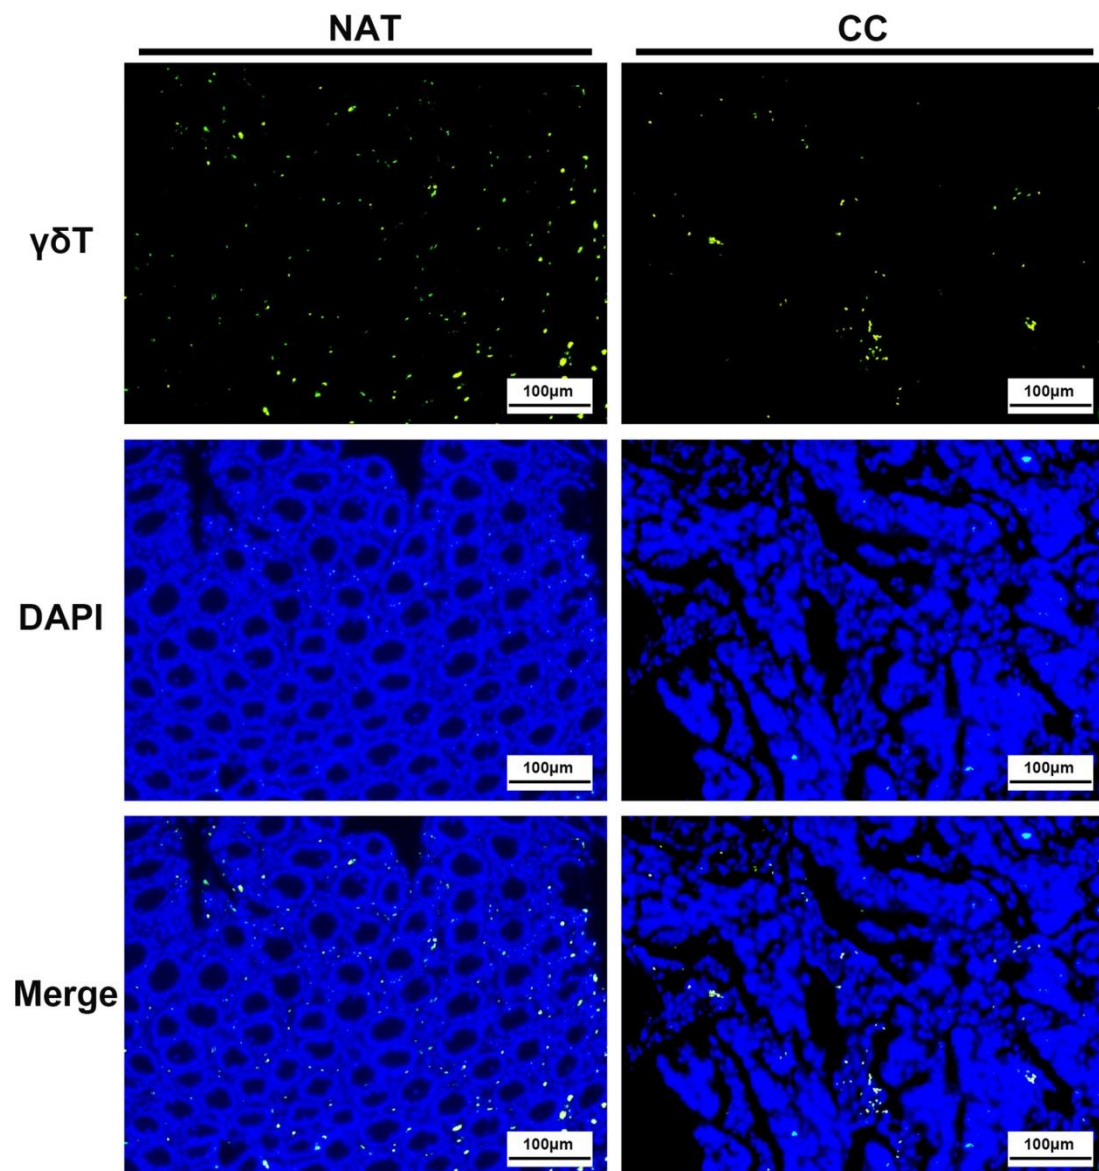

**Supplementary Fig. 7. Aberrant ULBP2 mRNA expression is positively correlated with B7-H3 mRNA expression in TCGA CC datasets.**

(a) The mRNA expression of B7-H3 and ULBP2 in NAT (n=17) and CC (n=173) specimens of TCGA CC database. (b) The correlation between B7-H3 and ULBP2 mRNA expression in CC specimens. n=173. Values are expressed as the means  $\pm$  SEM. \*p<0.05, and \*\*\*p<0.001.

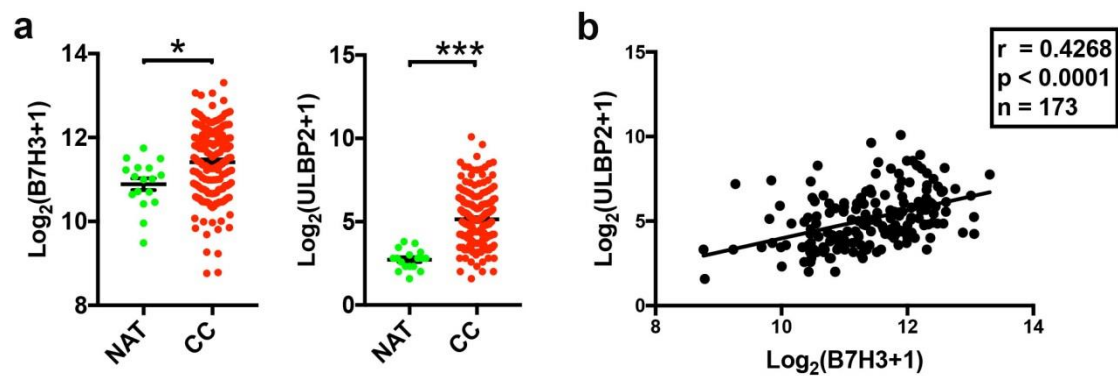

**Supplementary Fig. 8. The expression of MHC I, BTN3A1, and CD155 are not associated with B7-H3 in CC cells.** (a) The mRNA expression of MHC I, BTN3A1, and CD155 in B7-H3-overexpressing HCT116 and RKO cells were analyzed by RT-qPCR. (b) The mRNA expression of MHC I, BTN3A1, and CD155 in B7-H3 knockdown HCT116 and RKO cells were analyzed by RT-qPCR. Values are expressed as the means  $\pm$  SD. Data are representative of results from 3 independent experiments. \* $p < 0.05$ , \*\* $p < 0.01$ , and \*\*\* $p < 0.001$ .

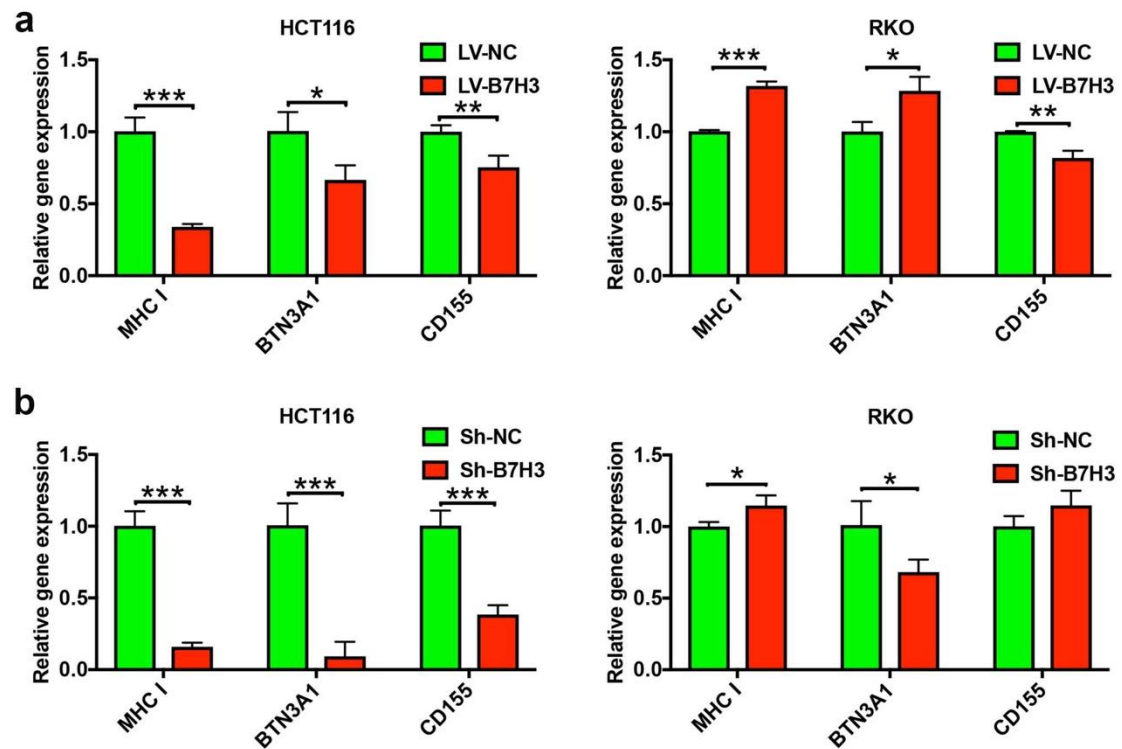

Supplement: 262_2020_2771_MOESM1_ESM.pdf [file 262_2020_2771_MOESM1_ESM.pdf]
